# Supplementary material for: Quantitative High-Throughput Screening Identifies 8-Hydroxyquinolines as Cell-Active Histone Demethylase Inhibitors
Source: PLOS journal article supplement (doi:10.1371/journal.pone.0015535), 2010-11-23

**Supplemental Figure S2. Kinetics and Mode of Inhibition of 5-carboxy-8-8HQ against JMJD2E.** FDH assay was carried out at 2  $\mu$ M JMJD2E, 200  $\mu$ M ARK(me3)STGGK peptide (excess of  $K_m$ ) and varying 2OG concentrations.

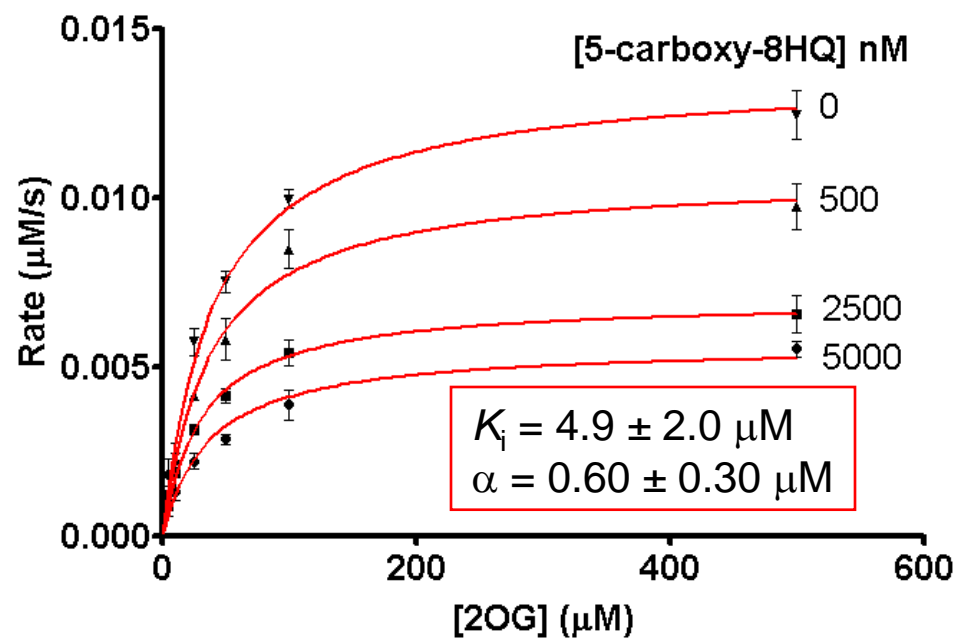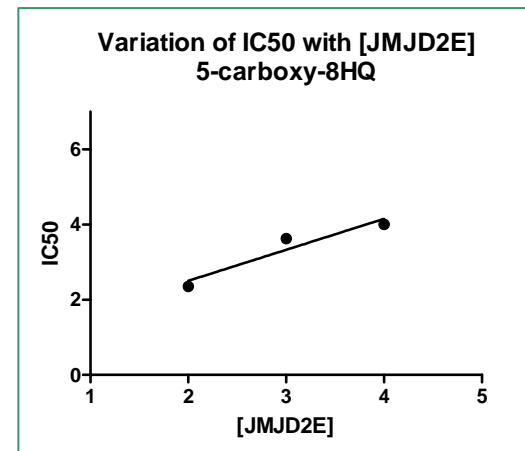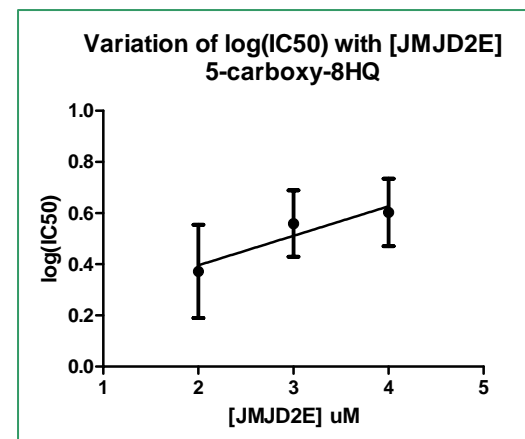

Supplement: S2 (10.1371/journal.pone.0015535.s002) [file journal.pone.0015535.s002]
